# Supplementary material for: Tissue architecture delineates field cancerization in BRAFV600E-induced tumor development
Source: Oxford University Press journal article supplement (doi:10.1242/dmm.048887), 2021-06-04
Supplement: dmm048887supp.pdf [file dmm048887supp.pdf]

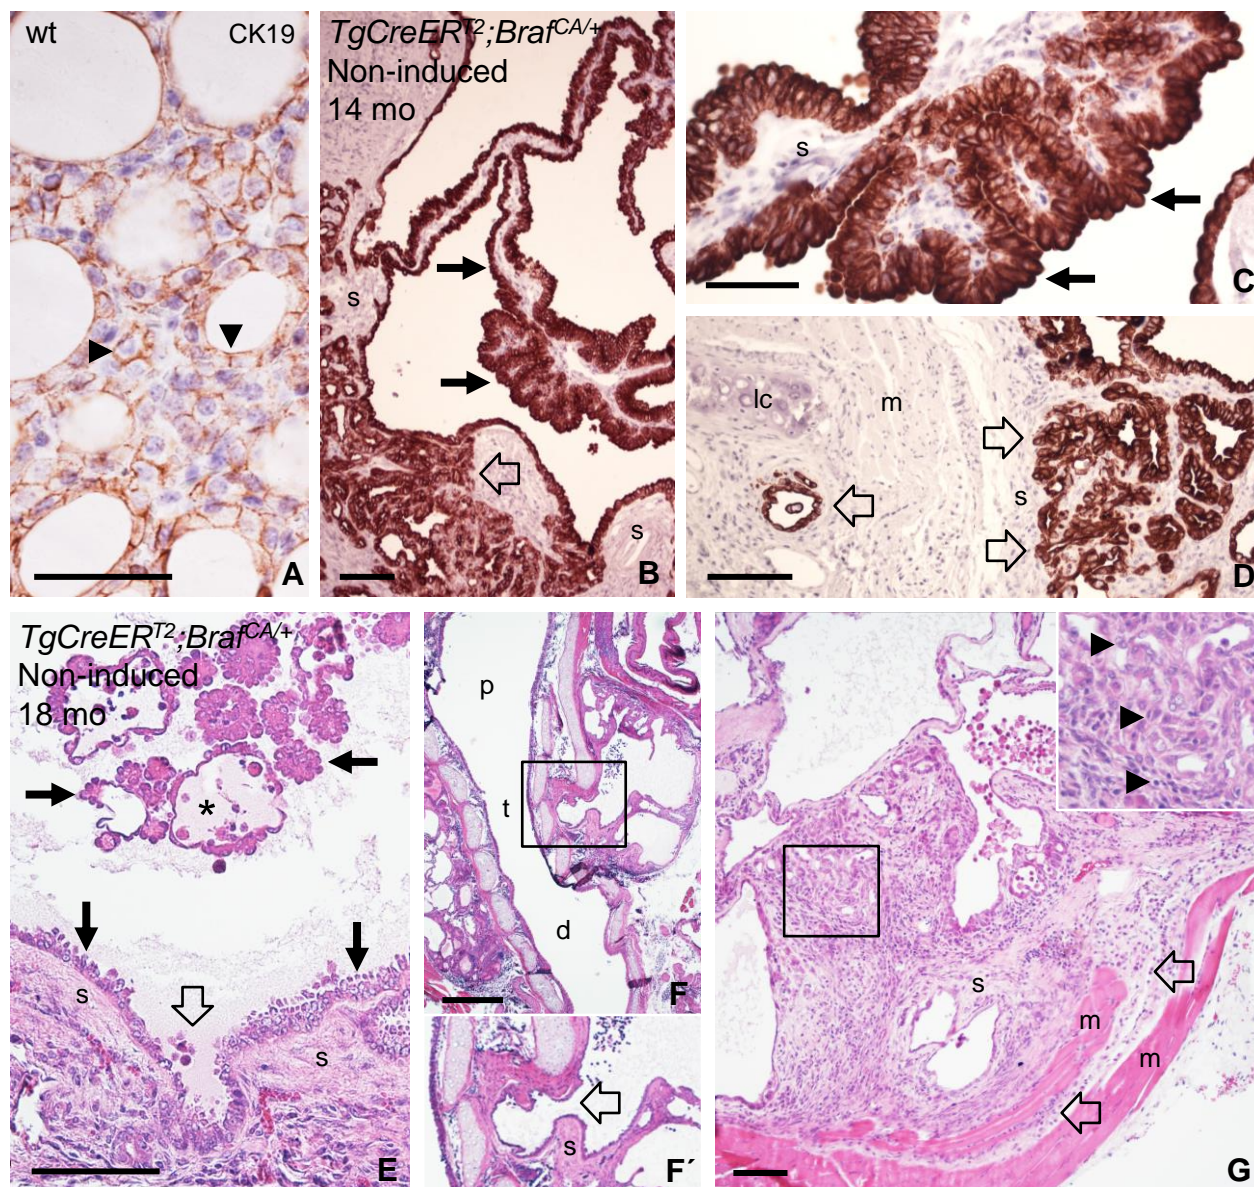

**Fig. S1.** Spontaneous *Braf*<sup>CA</sup> activation generates CK19 positive papillary thyroid carcinoma (PTC) with signs of tumor invasiveness. Images obtained from 14 and 18 months (mo) old *TgCreER*<sup>T2</sup>;*Braf*<sup>CA/+</sup> mice. CK19 immunohistochemistry (A-D). **A**, Weak CK19 expression in normal mouse thyroid. Arrowheads indicate preferential membranous localization of CK19 in follicular epithelial cells. **BC**, Strong expression of CK19 in tumor cells of a multilocular PTC. Arrows indicate tumorous epithelium lining enlarged follicular lumens and forming typical papillae. **D**, Stromal and extrathyroidal invasiveness of CK19<sup>+</sup> thyroid tumor cells indicated by open arrows (also shown in B). **B'** shows high power of boxed area in B. Note stromal infiltration of tumor cells (arrows). **E**, Cystic PTC with capsular invasion (open arrow). Note tumor cells display nuclear features typical of PTC and cell shape reminiscent of a hobnail-like phenotype. Asterisk indicates internal cavity of papillary formations projecting into the cyst. **F**, Cystic tumor infiltrating the trachea (open arrow in **F'** = high power of boxed area in **F**). **G**, Solid tumor originating from the wall of an enlarged follicle. Inset shows detail of boxed area with heterotypic tumor cells and tumor-infiltrating lymphocytes indicated by arrowheads. Open arrows indicate extrathyroidal tumor invasion. s, stroma; m, skeletal muscle; lc, laryngeal cartilage; t, trachea; p, proximal; d, distal. Scale bars: 500 (F), 100 (B, D, E, G) and 50 (A, C)  $\mu$ m.



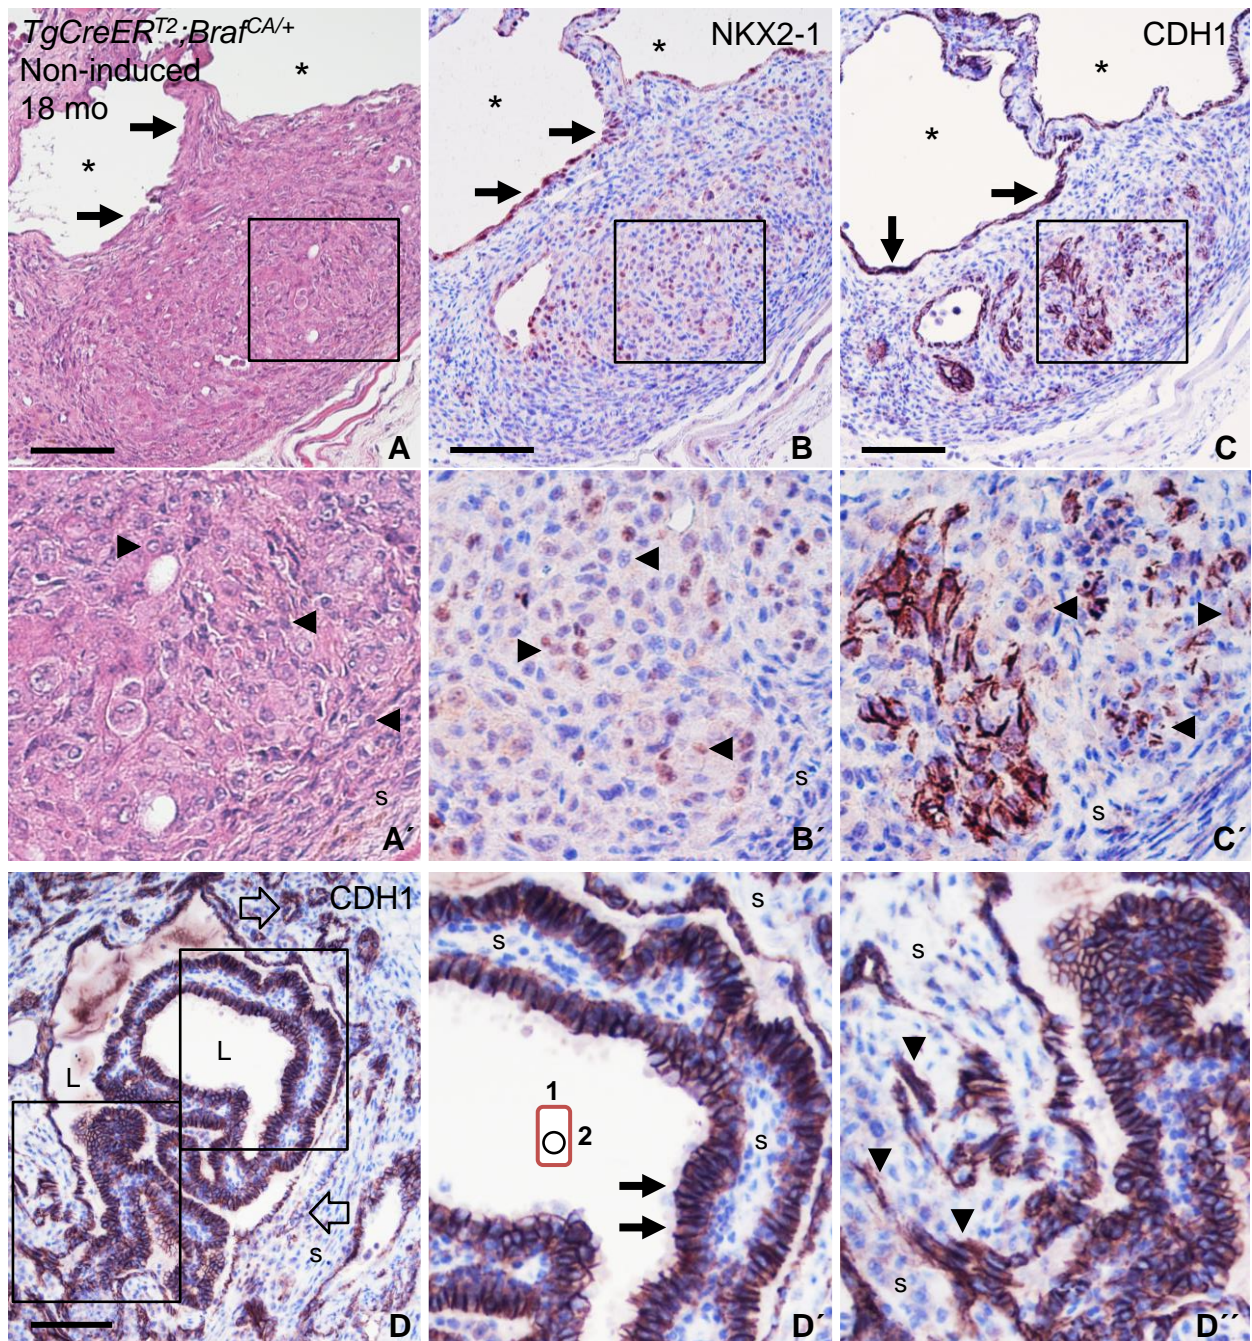

**Fig. S2.** Phenotype of tumor variants of papillary thyroid carcinoma (PTC) present in an 18 months old non-induced *TgCreER<sup>T2</sup>;Braf<sup>CA/+</sup>* mouse. Figs. 1I-K and S1E-G derive from the same thyroid specimen. **A-C**, Solid variant of PTC adjacent to an enlarged, septate follicle (asterisks). Histology (**A**) and immunostaining for NKX2-1 (**B**) and E-cadherin (CDH1; **C**) on parallel sections. **A'-C'** show high power of boxed areas. Arrows indicate flat epithelium strongly positive for both markers. Arrowheads show tumor cells with pleomorphic nuclei (**A'**), diminished expression of NKX2-1 (**B'**) and partial loss of CDH1 at cell contacts (**C'**). **D**, Tall-cell variant of PTC surrounded by abundant fibrous tissue intermixed with neoplastic follicles (large arrows). **D'**, **D''** highlight predominant cell shape with length/width ratio 2:1 or more (arrows and cartoon) in central tumor (**D'**) and signs of stromal invasion of CDH1+ tumor cells (**D''**; arrowheads). L, lumen of tumor; s, stroma. Scale bars (**A-D**): 100  $\mu$ m.



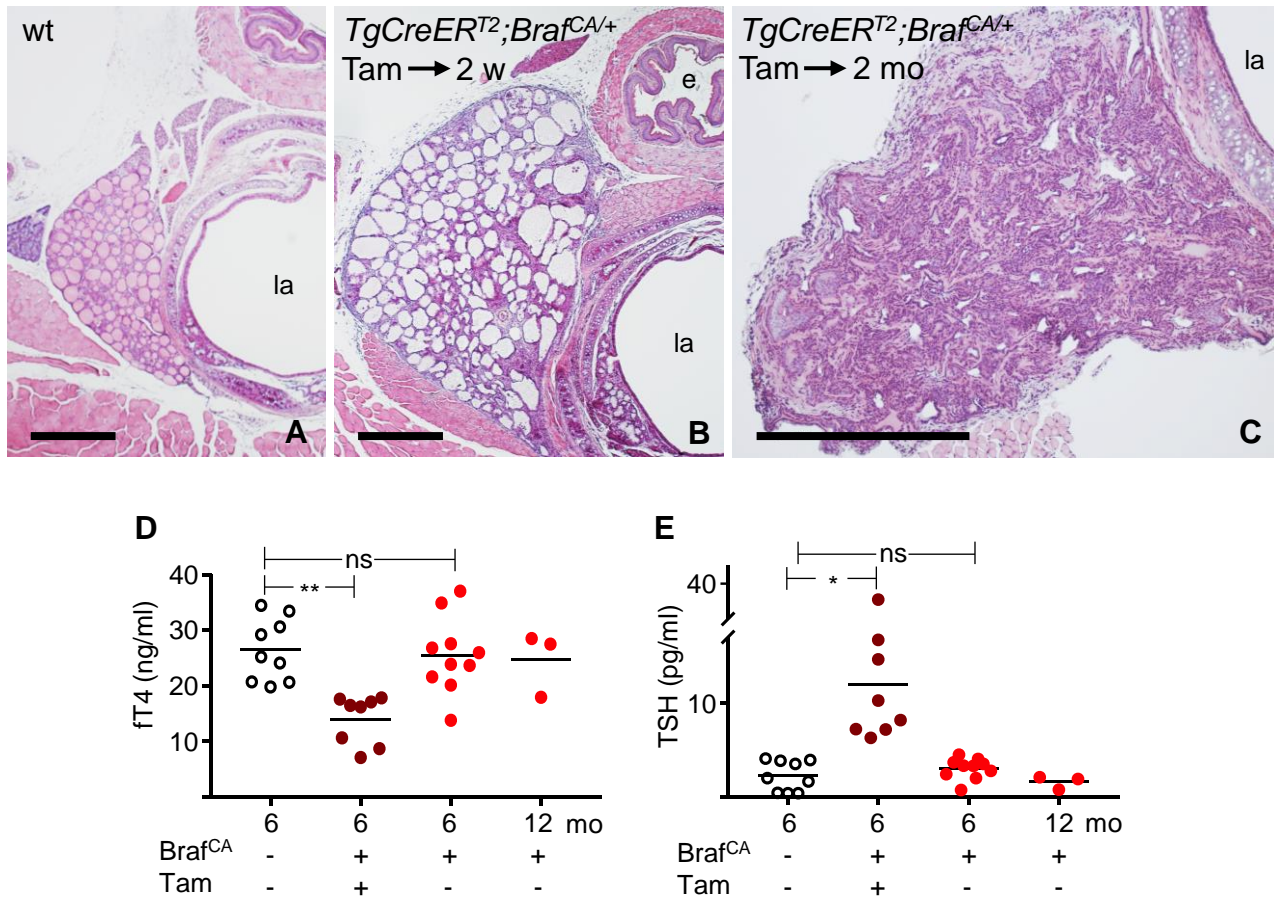

**Fig. S3.** Effects of induced *Braf<sup>CA</sup>* activation in mouse thyroid. *TgCreERT<sup>2</sup>;Braf<sup>CA/+</sup>* mice were injected or not with tamoxifen (tam; daily x3) after weaning. At times indicated, thyroids were excised and processed for microscopy of paraffin sections stained with hematoxylin-eosin, and peripheral blood was saved for measurements of thyroid stimulating hormone (TSH) and free thyroxine (fT4) levels. **A-C**, Cross section of right thyroid lobe in wildtype (wt) and *Braf* mutant mice 2 weeks (w) and 2 months (mo) after first tamoxifen injection. Note general morphological changes in mutant thyroids at both time points. la, larynx, cricoid level; e, esophagus. Scale bars: 500  $\mu$ m. **DE**, Mean and individual circulating free T4 (fT4) and TSH levels in mutant mice with tamoxifen-induced or spontaneous (non-induced) Cre activation. Dots represent individual values. \*, p=0.005; \*\*, p=0.005. ns, not significant.

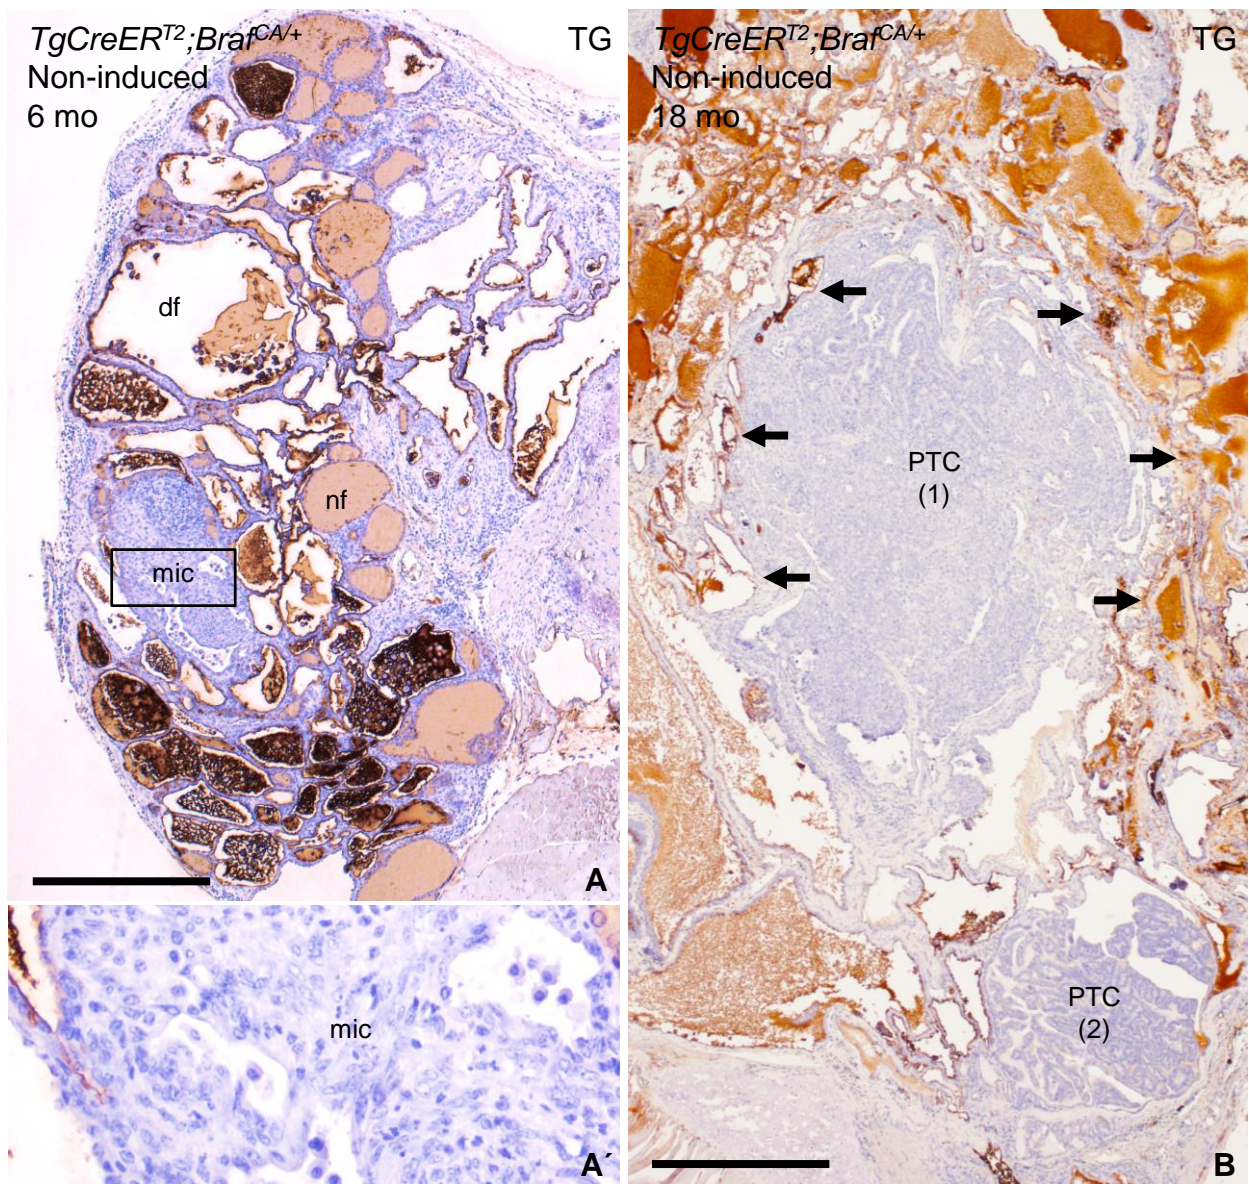

**Fig. S4.** Dedifferentiation – i.e. loss of thyroid function – of papillary thyroid carcinoma (PTC) cells in non-induced *TgCreER<sup>T2</sup>;Braf<sup>CA/+</sup>* mice. Images with immunohistochemical staining of thyroglobulin (TG). **A**, Overview of right thyroid lobe in a 6 months mutant mouse. The tissue consists mainly of TG positive (TG+) follicles with homogeneous or disrupted colloid and a microcarcinoma (mic) entirely free of TG immunoreactivity. **A'** shows high power of boxed area. nf, normal follicle; df, dilated follicle. **B**, Advanced tumor stage in an 18 month old mutant. Image from a parallel section to that shown in Fig. 1I. Only the two carcinomas (1 and 2) are devoid of TG; TG+ follicles are present in the marginal zone of tumors (arrows). Scale bars (A, B): 500  $\mu$ m.



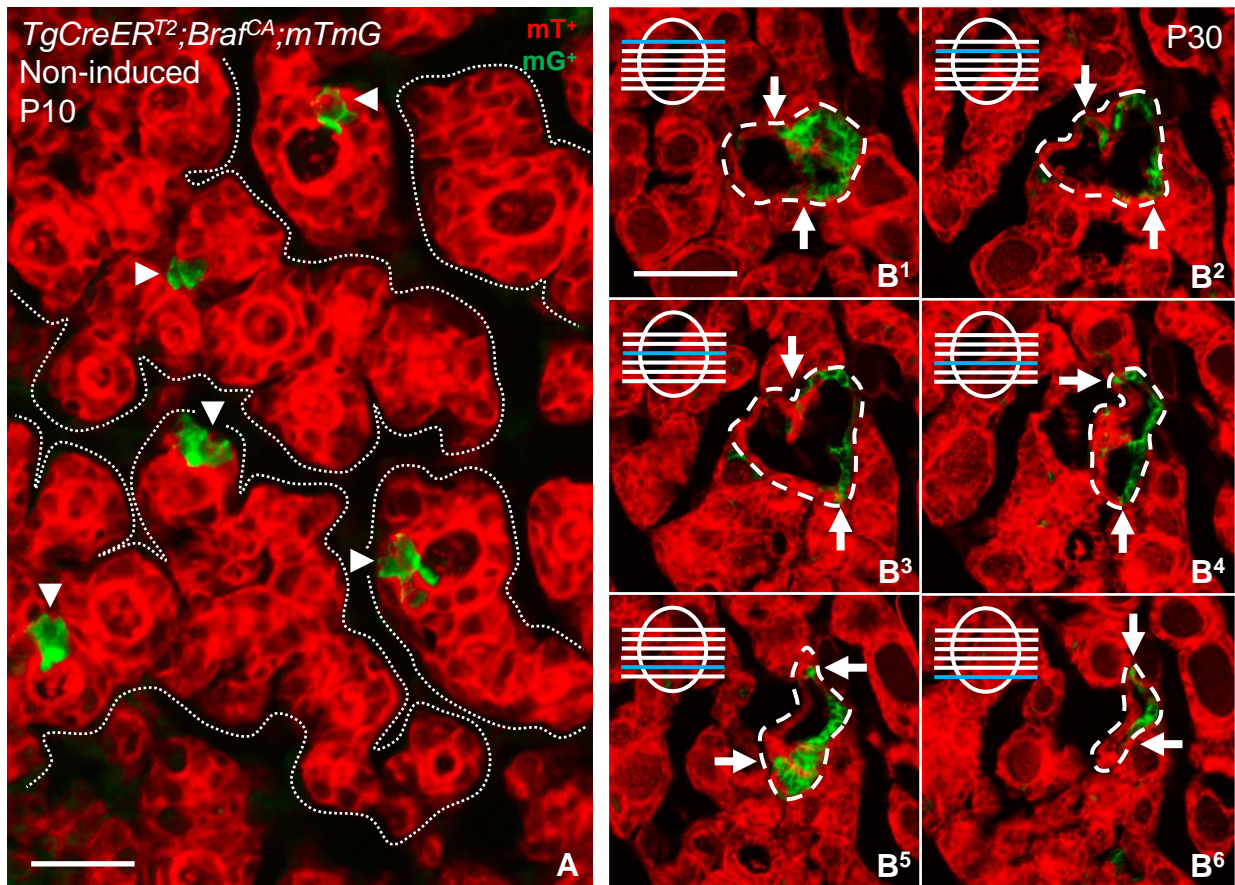

**Fig. S5.** Tracing spontaneous *Braf*<sup>CA</sup> activation and clonal development of *Braf* mutant cells in the postnatal thyroid gland. *TgCreERT<sup>2</sup>; Braf<sup>CA/+</sup>* mice were recombined with the double fluorescent *mTmG* reporter to generate *TgCreERT<sup>2</sup>; Braf<sup>CA/+</sup>; mTmG* mice. **A**, Incidence of *mTmG* activation as revealed at postnatal day 10 (P10). Arrowheads indicate single mG<sup>+</sup> follicle cells present in premature follicles. Branching network of parenchyma is outlined (dotted lines). **B**, Serial sections (B<sup>1</sup>-B<sup>6</sup>) of an enlarged, dual labeled (compound mT<sup>+</sup>/mG<sup>+</sup>) follicle with an irregular, abnormal shape (encircled). Section levels with reference to the enlarged follicle are indicated in upper, left corner; B<sup>3</sup> is identical to Fig. 4H. Note the follicle consists of two differentially labeled, contiguous epithelial domains of equal size. Arrows indicate transition sites of mT<sup>+</sup> and mG<sup>+</sup> clones. Scale bars: 100 (B) and 25 (A)  $\mu$ m.

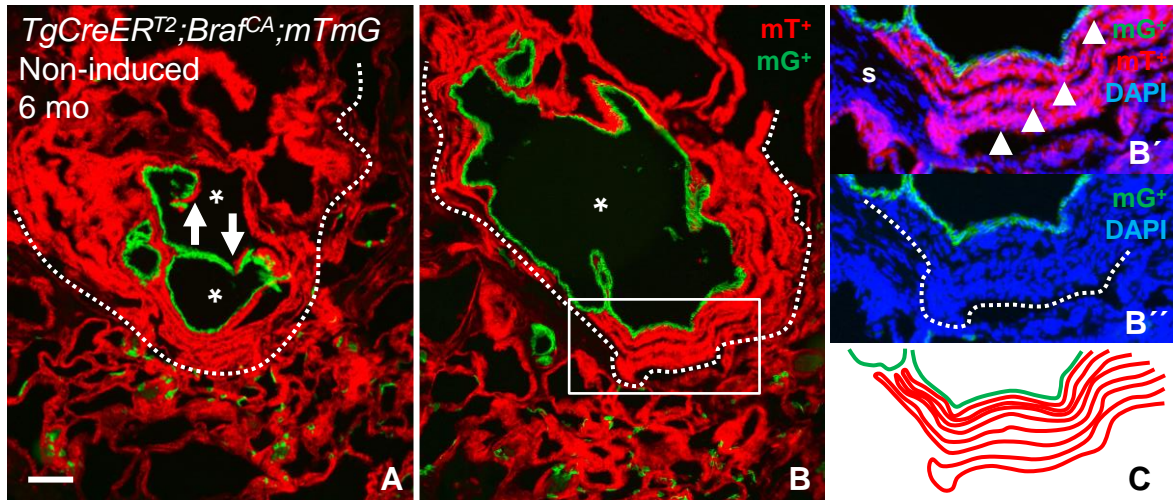

**Fig. S6.** Clonal selection of growth in papillary thyroid carcinogenesis following stochastic *Braf*<sup>CA</sup> activation. Thyroid tissue from a 6 month (mo) old *TgCreERT2*;*Braf*<sup>CA/+</sup>;*mTmG* mouse. **A, B**, Serial images of a dual labeled tumor (encircled) indicating predominant papillary growth of a mT<sup>+</sup> clone entrapping a mG<sup>+</sup> clone that essentially faces the enlarged lumen (asterisks). Arrows indicate clonal transition sites of the originating oligoclonal epithelium. **B'**, **B''** show boxed area in **B** with additional DAPI staining illustrating multilayered folding (arrowheads) of the mT<sup>+</sup> neoplastic epithelium. **C**, Cartoon of **B'** for clarity. s, stromal tissue surrounding tumor. Scale bar: 100  $\mu$ m.

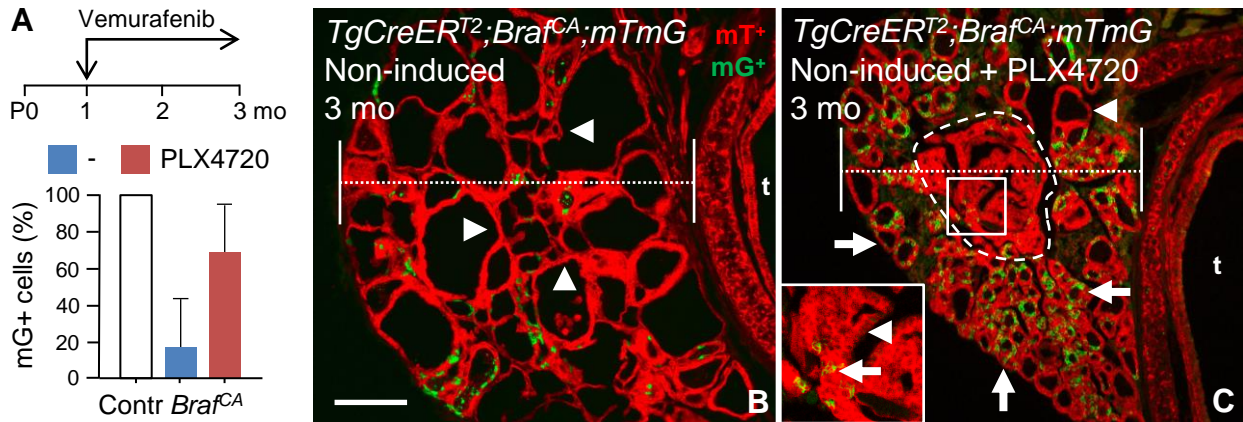

**Fig. S7.** Resistance of tumorigenic clones to *Braf<sup>V600E</sup>* kinase inhibition. *TgCreERT<sup>2</sup>;Braf<sup>CA/+</sup>;mTmG* mice were fed PLX4720 (417 ppm) from weaning and sacrificed at 3 months of age. Serial sections were counted for mG<sup>+</sup> thyroid cells and compared to that of age-matched *TgCreERT<sup>2</sup>;mTmG* mice. **A**, Maintained reporter gene activation in drug-treated mutants. Mean±sd (n): controls (6), untreated mutants (6), tamoxifen-treated mutants (6); three section levels/gland. **B**, **C**, Normalization of lobe size (indicated by brackets), follicle size and mG<sup>+</sup> labeling of cells by vemurafenib. Note preserved mT<sup>+</sup> labeling of microcarcinoma cells (encircled). Inset shows boxed area in C. Arrows, G<sup>+</sup> cells; arrowheads, mT<sup>+</sup> cells; t, trachea. Scale bar: 200 μm.

**Table S1.** Quality data from whole exome sequencing of thyroid carcinomas generated by spontaneous activation of *Braf*<sup>V600E</sup> in *TgCreER*<sup>T2</sup>;*Braf*<sup>CA/+</sup> mice.

| Mouse Id | Sample <sup>1</sup> | Total number of reads | Mapped number of reads | % of mapped reads | Mean coverage |
|----------|---------------------|-----------------------|------------------------|-------------------|---------------|
| 3182     | Tumor               | 60027679              | 59294617               | 98.78             | 185.36        |
|          | Normal              | 28873205              | 28555696               | 98.91             | 90.0824       |
| 4187     | Tumor               | 57690485              | 57690485               | 98.96             | 173.888       |
|          | Normal              | 43839295              | 43360247               | 98.91             | 135.016       |
| 4655     | Tumor               | 85800968              | 84806007               | 98.85             | 260.843       |
|          | Normal              | 29903775              | 29544091               | 98.8              | 92.7111       |
| 4743     | Tumor               | 71108114              | 69976003               | 98.41             | 209.029       |
|          | Normal              | 23167811              | 22835561               | 98.57             | 69.0573       |
| 4747     | Tumor               | 73639412              | 72888030               | 98.98             | 223.971       |
|          | Normal              | 18999407              | 18809921               | 99.01             | 58.0215       |

<sup>1</sup>Normal refers to constitutional control tissues (kidney) obtained from the same mice

**Table S2.** Gene expression changes associated with dedifferentiation of *Braf* mutant thyroid cells after spontaneous and induced *Braf*<sup>CA</sup> activation in *TgCreER*<sup>T2</sup>;*Braf*<sup>CA/+</sup> mice.

| Tam <sup>2</sup> | qPCR <sup>1</sup> |             |                   |             |             |
|------------------|-------------------|-------------|-------------------|-------------|-------------|
|                  | <i>Pax8</i>       | <i>Tg</i>   | <i>Slc5a5/Nis</i> | <i>Tpo</i>  | <i>Tshr</i> |
| -                | 0,90 ± 0,19       | 0,57 ± 0,20 | 0,16 ± 0,03       | 0,45 ± 0,06 | 0,63 ± 0,11 |
| +                | 0,25 ± 0,02       | 0,03 ± 0,01 | 0,15 ± 0,06       | 0,13 ± 0,04 | 0,19 ± 0,03 |

<sup>1</sup>Analysis of thyroid tissue samples obtained from 5 weeks + 10 days (± post-injection) old mice (n=3/group)

<sup>2</sup>Tamoxifen; i.p. injections daily x3 after weaning

<sup>3</sup>Mean ± sd; expression relative to transcript levels in control (*TgCreER*<sup>T2</sup>) mice set to “1”



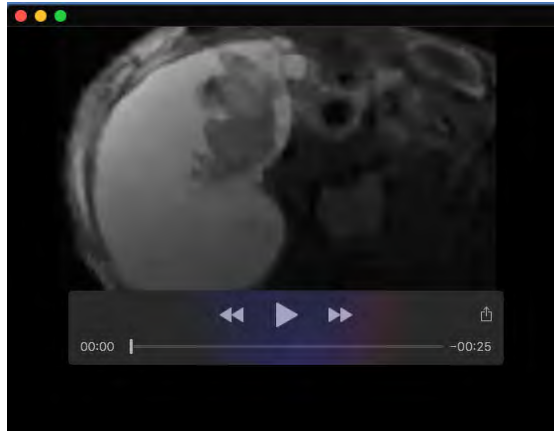

**Movie 1.** Magnetic resonance imaging (MRI) of multicentric papillary thyroid carcinomas. Scrolling stack of images based on transverse MRI encompassing the entire thyroid gland and surrounding neck tissues in a 14 month old *TgCreER<sup>T2</sup>;Braf<sup>CA/+</sup>* mouse subjected to spontaneous (non-induced) *Braf<sup>CA</sup>* activation. For technical data and keys to image details, see Materials & Methods and accompanying Figs. 1G and H. Image resolution is inherited to technical constraints.
